# Supplementary material
Source: publisher figshare collection journal article supplement (https://gsapubs.figshare.com/ndownloader/files/23293673)
Supplement: Supplementary file 1 [file 23293673]

**Supplementary Figure. 1.** Elements profiling of feldspar using Energy Dispersive Spectra.

**Supplementary Figure. 2.** An inverse isochron plot (Between  $^{40}\text{Ar}$ - $^{39}\text{Ar}$  and  $^{40}\text{Ar}$ - $^{36}\text{Ar}$ ). The intercept with the  $^{36}\text{Ar}/^{40}\text{Ar}$  axis gives the trapped Argon composition. The intercept with the  $^{39}\text{Ar}/^{40}\text{Ar}$  axis gives the radiogenic Argon composition.



# Supplementary Fig. 1

Line scan in EDS showing replacement of Na (red line) by K (sky blue) at the margins and interstitial spaces of plagioclase (BSE image).

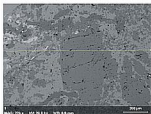

Date: 04/03/2008 15:48:25  
Image size: 1000 x 750  
Mag: 274.63251 x  
HV: 20.0 kV

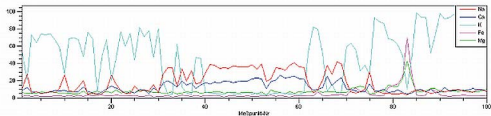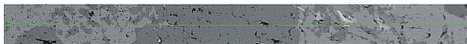

Line scan  
Date: 04/03/2008 15:52:10  
Measure time: 2:42 min  
Start: (17,320) End: (1000,310)  
Length: 1200  $\mu$ m

# Supplementary Fig. 2

RC5F028A.AGE >>> SSZ-03 (E7-88)

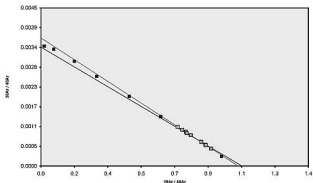

Ar-Ages in Ma

Weighted Plateau  
 $9.60 \pm 0.07$   
 Total Fusion  
 $9.65 \pm 0.06$   
 Normal Isochron  
 $9.99 \pm 0.09$   
 Inverse Isochron  
 $9.99 \pm 0.09$

MSWD  
 0.53

Sample Info

Bottle  
 R Clark NW India  
 msp  
 c154-  
 0.00591 (J)

RC5F028A.AGE >>> SSZ-04 (E7-86)

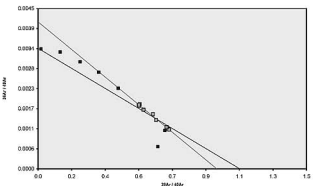

Ar-Ages in Ma

Weighted Plateau  
 $9.48 \pm 0.28$   
 Total Fusion  
 $9.05 \pm 0.09$   
 Normal Isochron  
 $10.69 \pm 0.30$   
 Inverse Isochron  
 $10.69 \pm 0.29$

MSWD  
 4.65

Sample Info

Bottle  
 Ryan Clark  
 msp  
 c154-  
 0.00693 (J)

RC5F028B.AGE >>> SSZ-05 (E7-87)

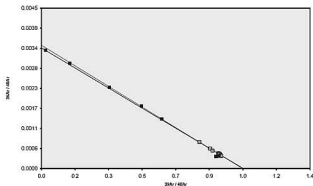

Ar-Ages in Ma

Weighted Plateau  
 $10.34 \pm 0.06$   
 Total Fusion  
 $10.37 \pm 0.06$   
 Normal Isochron  
 $10.37 \pm 0.12$   
 Inverse Isochron  
 $10.38 \pm 0.12$

MSWD  
 2.11

Sample Info

Bottle  
 R Clark NW India  
 msp  
 c154-  
 0.00595 (J)
